# Supplementary material for: Triclosan resistance in methicillin-resistant Staphylococcus aureus expressed as small colony variants: a novel mode of evasion of susceptibility to antiseptics
Source: Oxford University Press journal article supplement (doi:10.1093/jac/dkm031), 2007-03-02
Supplement: dkm031_Supplementary_Data.zip [file dkm031_Supplementary_Data.zip]

## Supplementary data

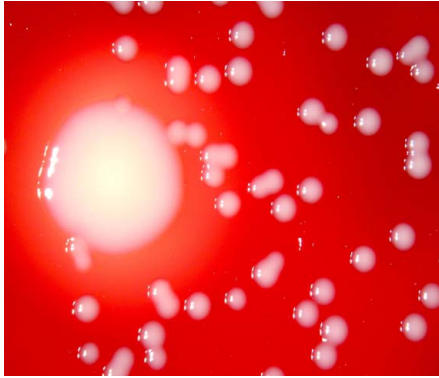

**Figure 3.** Magnification  $\times 5$  of SCV after 72 h of exposure of MRSA F1854 to triclosan, showing the difference in colony size and the lack of haemolysis in the SCV.
