# Supplementary material for: Triclosan resistance in methicillin-resistant Staphylococcus aureus expressed as small colony variants: a novel mode of evasion of susceptibility to antiseptics
Source: Oxford University Press journal article supplement (doi:10.1093/jac/dkm031), 2007-03-02
Supplement: dkm031_Supplementary_Data.zip [file dkm031_Supplementary_Data.zip]

Archive with 1 entries (1 files):
- dkm031supp.pdf
